# Supplementary material
Source: MDPI journal article supplement (https://www.mdpi.com/2072-4292/12/18/2947)
Supplement: s1 [file s1]

# 1 Supplemental figures to Jacobs et al.

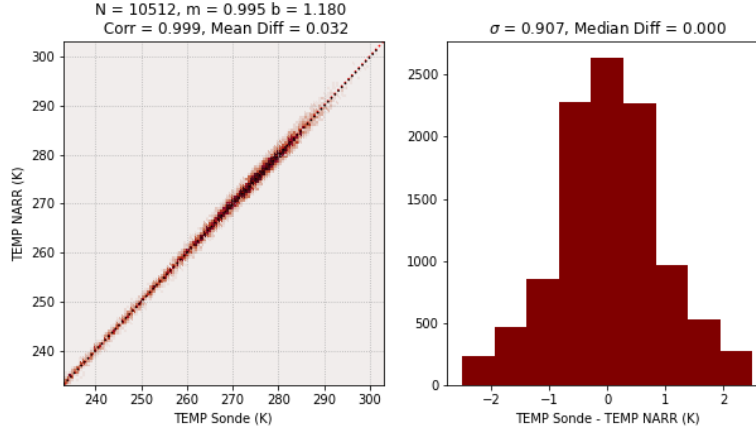

Figure 1: **a)** Scatter plot of the meteorological winter NARR temperature values for NRMN vs the OUN sounding temperature binned to  $0.5 \text{ K}^{-1}$ . Black line is the least-squares regression, and the red dotted line is the 1-to-1 line. The title displays the slope ( $m$ ), the intercept ( $b$ ), the number of points ( $N$ ), the Pearson correlation ( $\text{Corr}$ ), and the mean difference ( $\text{Mean Diff}$ ). **(b)** The two-dimensional histogram displays the differences in temperature between the sounding data and the NARR data for meteorological winter. The title displays the standard deviation ( $\sigma$ ) and the median difference ( $\text{Median Diff}$ ).

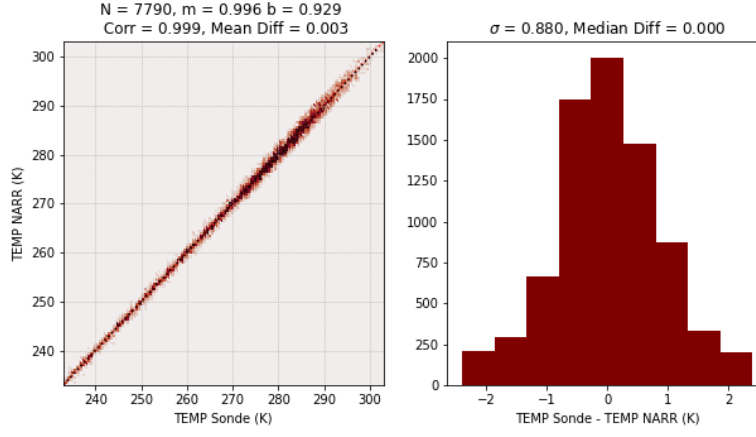

Figure 2: **a)** Scatter plot of the meteorological spring NARR temperature values for NRMN vs the OUN sounding temperature binned to  $0.5 \text{ K}^{-1}$ . Black line is the least-squares regression, and the red dotted line is the 1-to-1 line. The title displays the slope ( $m$ ), the intercept ( $b$ ), the number of points ( $N$ ), the Pearson correlation ( $\text{Corr}$ ), and the mean difference (Mean Diff). **(b)** The two-dimensional histogram displays the differences in temperature between the sounding data and the NARR data for meteorological spring. The title displays the standard deviation ( $\sigma$ ) and the median difference (Median Diff).

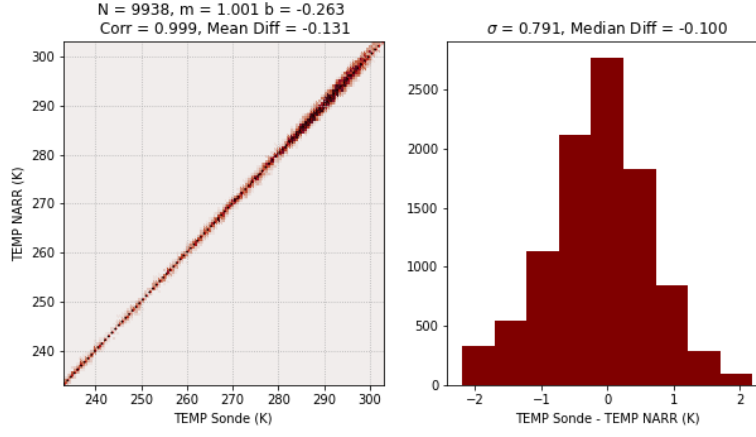

Figure 3: **a)** Scatter plot of the meteorological summer NARR temperature values for NRMN vs the OUN sounding temperature binned to  $0.5 \text{ K}^{-1}$ . Black line is the least-squares regression, and the red dotted line is the 1-to-1 line. The title displays the slope ( $m$ ), the intercept ( $b$ ), the number of points ( $N$ ), the Pearson correlation ( $\text{Corr}$ ), and the mean difference ( $\text{Mean Diff}$ ). **(b)** The two-dimensional histogram displays the differences in temperature between the sounding data and the NARR data for meteorological summer. The title displays the standard deviation ( $\sigma$ ) and the median difference ( $\text{Median Diff}$ ).

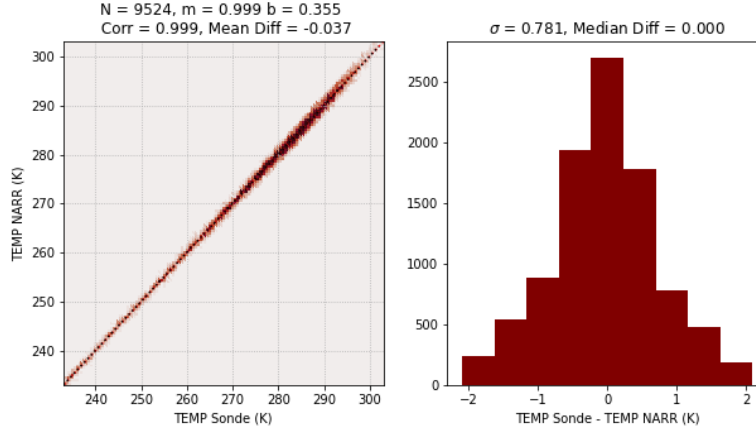

Figure 4: **a)** Scatter plot of the meteorological autumn NARR temperature values for NRMN vs the OUN sounding temperature binned to  $0.5 \text{ K}^{-1}$ . Black line is the least-squares regression, and the red dotted line is the 1-to-1 line. The title displays the slope ( $m$ ), the intercept ( $b$ ), the number of points ( $N$ ), the Pearson correlation ( $\text{Corr}$ ), and the mean difference ( $\text{Mean Diff}$ ). **(b)** The two-dimensional histogram displays the differences in temperature between the sounding data and the NARR data for meteorological autumn. The title displays the standard deviation ( $\sigma$ ) and the median difference ( $\text{Median Diff}$ ).

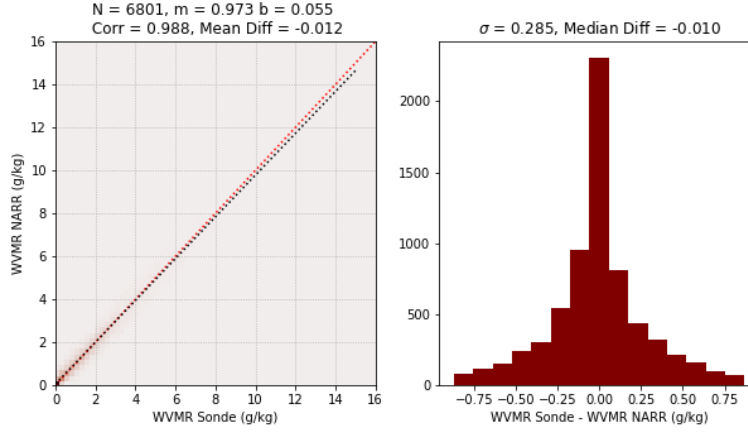

Figure 5: **a)** Scatter plot of the meteorological winter NARR water vapor mixing ratio values for NRMN vs the OUN sounding water vapor mixing ratio binned to  $0.25 \text{ g/kg}^{-1}$ . Black line is the least-squares regression, and the red dotted line is the 1-to-1 line. The title displays the slope ( $m$ ), the intercept ( $b$ ), the number of points ( $N$ ), the Pearson correlation ( $\text{Corr}$ ), and the mean difference ( $\text{Mean Diff}$ ). **(b)** The two-dimensional histogram displays the differences in water vapor mixing ratio between the sounding data and the NARR data for meteorological winter. The title displays the standard deviation ( $\sigma$ ) and the median difference ( $\text{Median Diff}$ ).

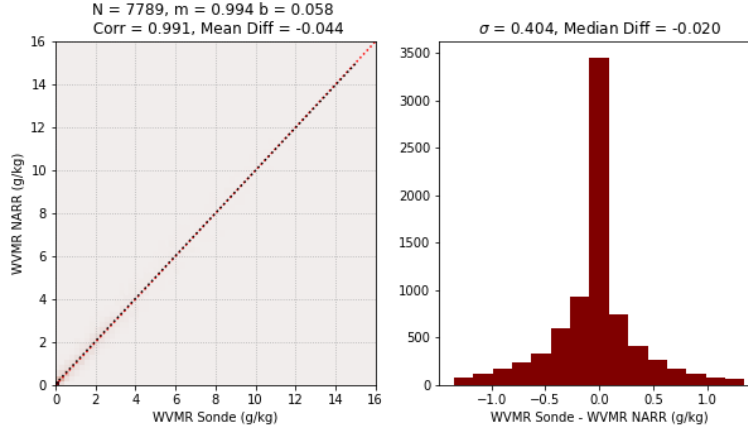

Figure 6: **a)** Scatter plot of the meteorological spring NARR water vapor mixing ratio values for NRMN vs the OUN sounding water vapor mixing ratio binned to  $0.25 \text{ g/kg}^{-1}$ . Black line is the least-squares regression, and the red dotted line is the 1-to-1 line. The title displays the slope ( $m$ ), the intercept ( $b$ ), the number of points ( $N$ ), the Pearson correlation ( $\text{Corr}$ ), and the mean difference ( $\text{Mean Diff}$ ). **(b)** The two-dimensional histogram displays the differences in water vapor mixing ratio between the sounding data and the NARR data for meteorological spring. The title displays the standard deviation ( $\sigma$ ) and the median difference ( $\text{Median Diff}$ ).

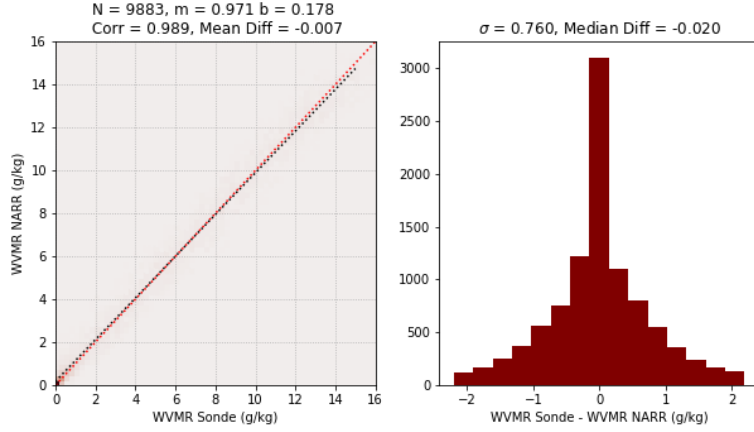

Figure 7: **a)** Scatter plot of the meteorological summer NARR water vapor mixing ratio values for NRMN vs the OUN sounding water vapor mixing ratio binned to  $0.25 \text{ g/kg}^{-1}$ . Black line is the least-squares regression, and the red dotted line is the 1-to-1 line. The title displays the slope ( $m$ ), the intercept ( $b$ ), the number of points ( $N$ ), the Pearson correlation ( $\text{Corr}$ ), and the mean difference ( $\text{Mean Diff}$ ). **(b)** The two-dimensional histogram displays the differences in water vapor mixing ratio between the sounding data and the NARR data for meteorological summer. The title displays the standard deviation ( $\sigma$ ) and the median difference ( $\text{Median Diff}$ ).

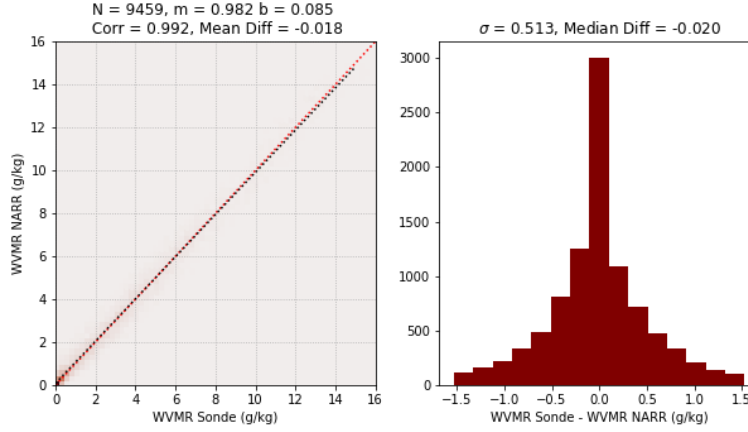

Figure 8: **a)** Scatter plot of the meteorological autumn NARR water vapor mixing ratio values for NRMN vs the OUN sounding water vapor mixing ratio binned to  $0.25 \text{ g/kg}^{-1}$ . Black line is the least-squares regression, and the red dotted line is the 1-to-1 line. The title displays the slope ( $m$ ), the intercept ( $b$ ), the number of points ( $N$ ), the Pearson correlation ( $\text{Corr}$ ), and the mean difference ( $\text{Mean Diff}$ ). **(b)** The two-dimensional histogram displays the differences in water vapor mixing ratio between the sounding data and the NARR data for meteorological autumn. The title displays the standard deviation ( $\sigma$ ) and the median difference ( $\text{Median Diff}$ ).

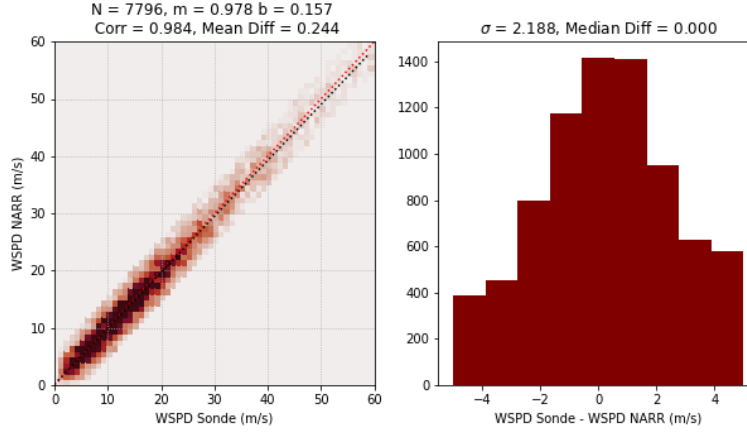

Figure 9: **(a)** Scatter plot of the meteorological spring NARR wind speed values for NRMN vs the OUN sounding wind speed values binned to  $1 \text{ m s}^{-1}$ . Black line is the least-squares regression, and the red dotted line is the 1-to-1 line. The title displays the slope ( $m$ ), the intercept ( $b$ ), the number of points ( $N$ ), the Pearson correlation ( $\text{Corr}$ ), and the mean difference (Mean Diff). **(b)** The two-dimensional histogram displays the differences in wind speeds between the sounding data and the NARR data for meteorological spring. The title displays the standard deviation ( $\sigma$ ) and the median difference (Median Diff).

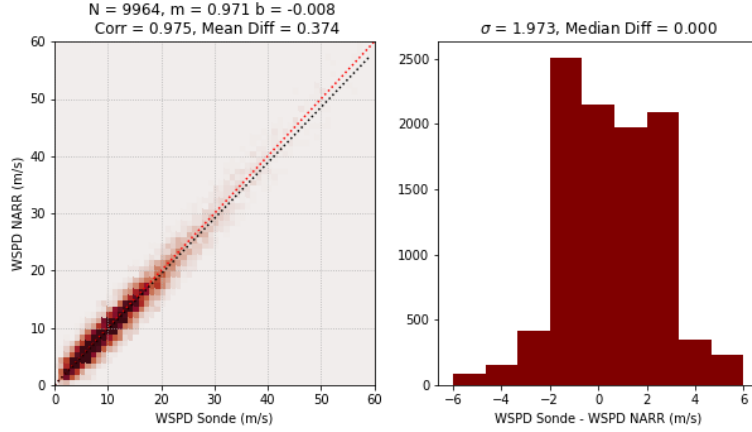

Figure 10: **(a)** Scatter plot of the meteorological autumn NARR wind speed values for NRMN vs the OUN sounding wind speed values binned to  $1 \text{ m s}^{-1}$ . Black line is the least-squares regression, and the red dotted line is the 1-to-1 line. The title displays the slope ( $m$ ), the intercept ( $b$ ), the number of points ( $N$ ), the Pearson correlation ( $\text{Corr}$ ), and the mean difference ( $\text{Mean Diff}$ ). **(b)** The two-dimensional histogram displays the differences in wind speeds between the sounding data and the NARR data for meteorological autumn. The title displays the standard deviation ( $\sigma$ ) and the median difference ( $\text{Median Diff}$ ).

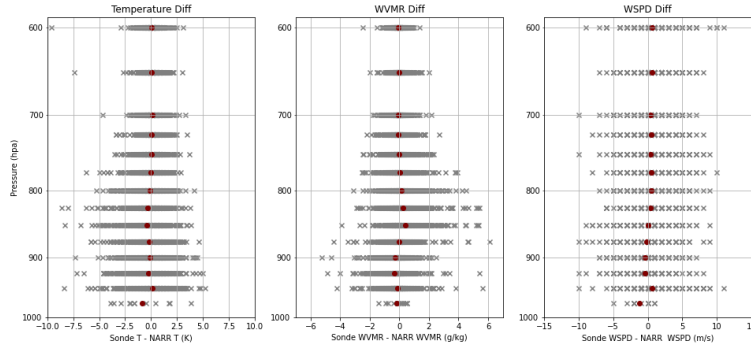

Figure 11: The differences in temperature **(a)**, water vapor mixing ratio **(b)**, and wind speed **(c)** for meteorological spring. Each x marks a difference, with the red symbol representing the mean. Differences are plotted with respect to atmospheric pressure on a logarithmic scale.

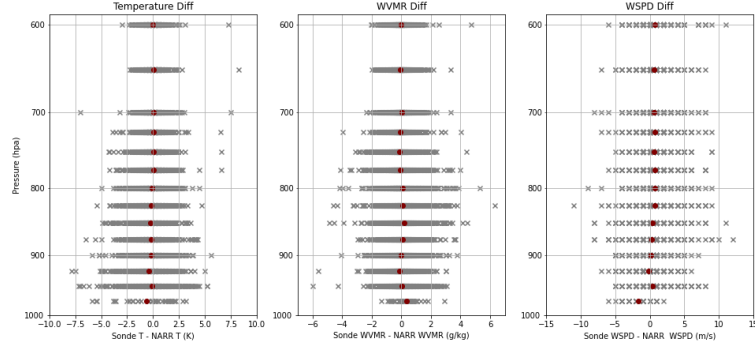

Figure 12: The differences in temperature (a), water vapor mixing ratio (b), and wind speed (c) for meteorological autumn. Each x marks a difference, with the red symbol representing the mean. Differences are plotted with respect to atmospheric pressure on a logarithmic scale.

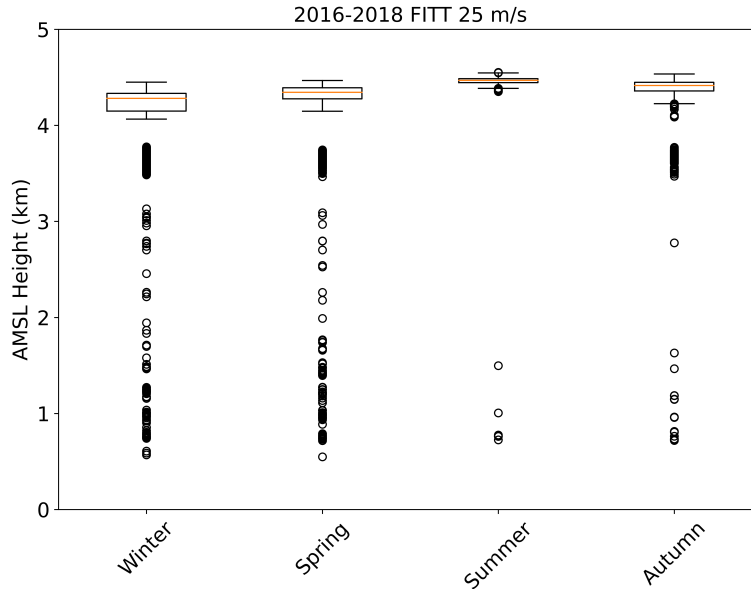

Figure 13: The maximum height reached for the FITT site given a maximum wind speed tolerance of  $25 \text{ m s}^{-1}$ .

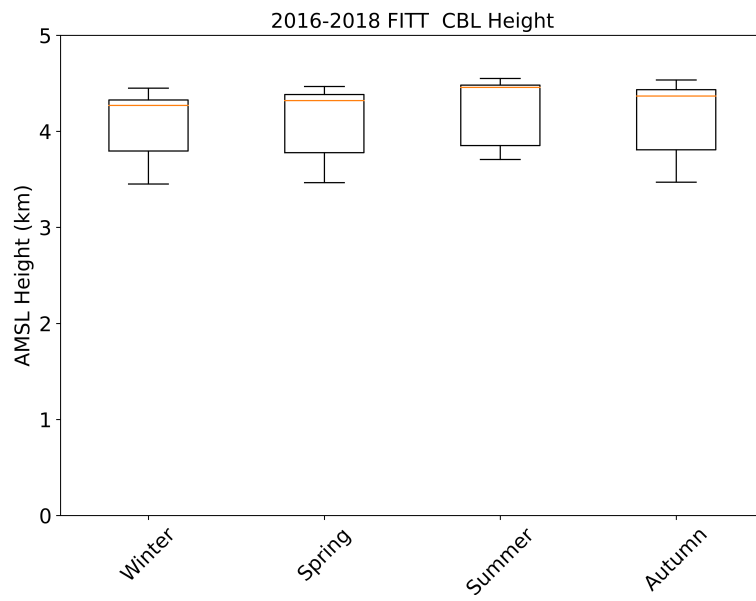

Figure 14: The maximum height reached for the FITT site given the CBL height restriction.

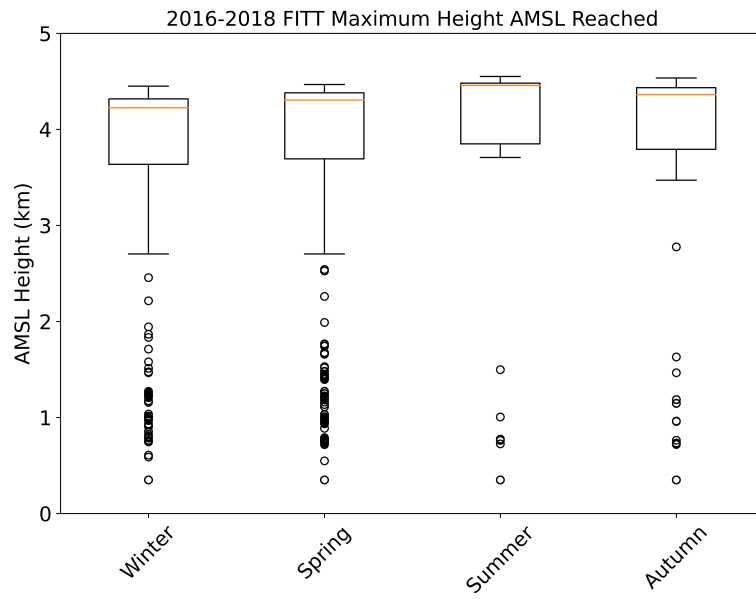

Figure 15: The maximum height reached for the FITT site.

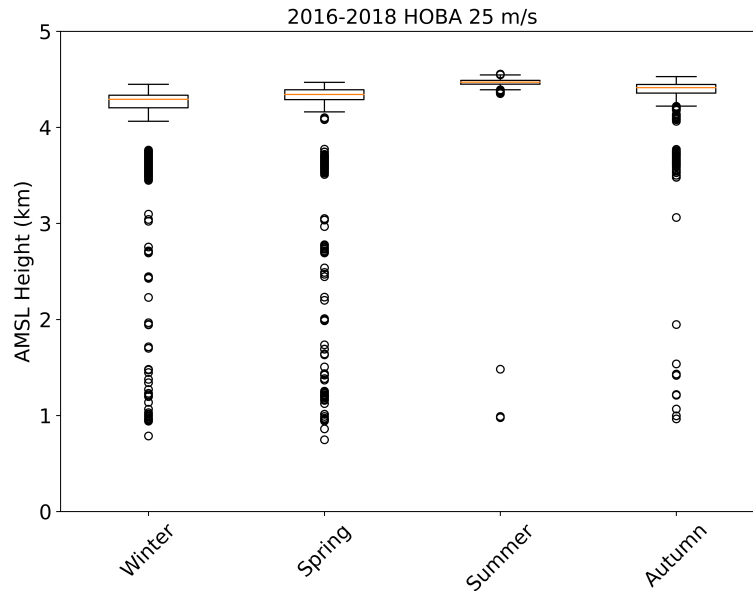

Figure 16: The maximum height reached for the HOBA site given a maximum wind speed tolerance of  $25 \text{ m s}^{-1}$ .

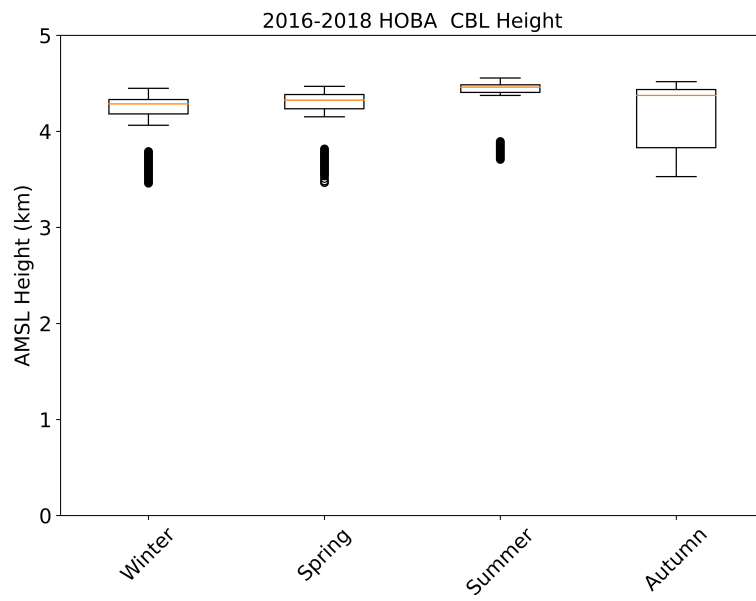

Figure 17: The maximum height reached for the HOBA site given the CBL height restriction.

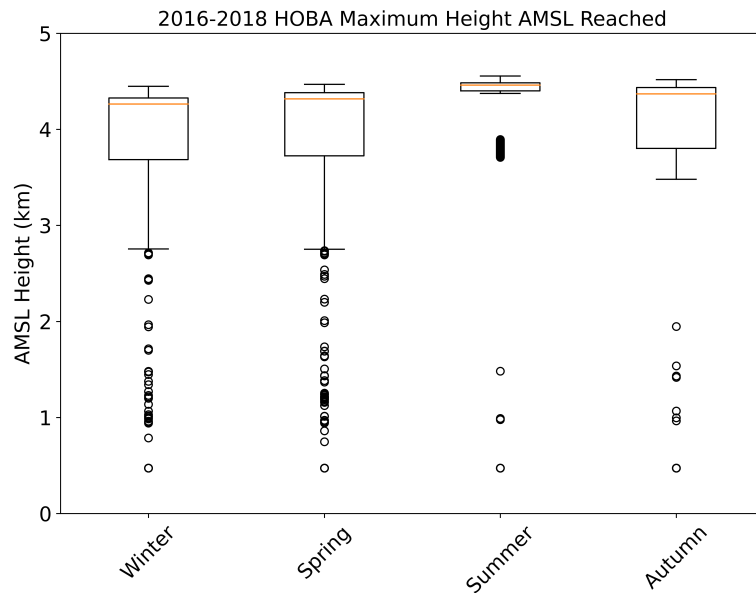

Figure 18: The maximum height reached for the HOBA site.

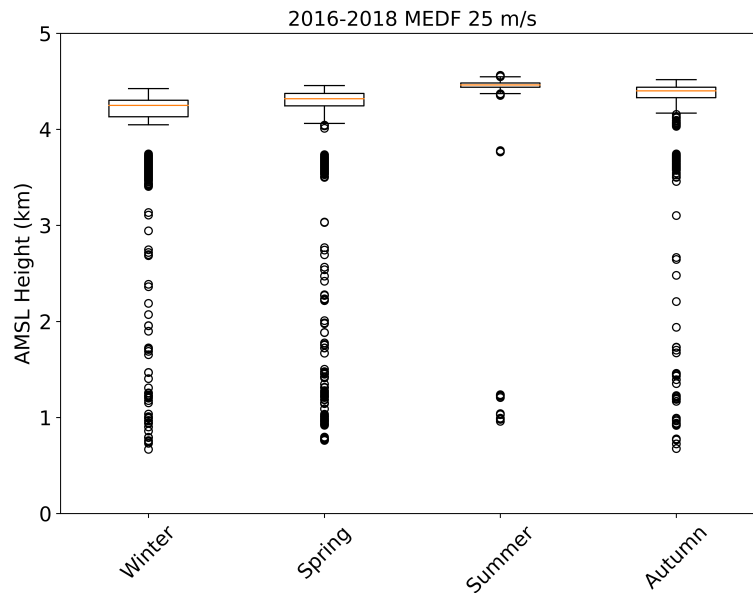

Figure 19: The maximum height reached for the MEDF site given a maximum wind speed tolerance of  $25 \text{ m s}^{-1}$ .

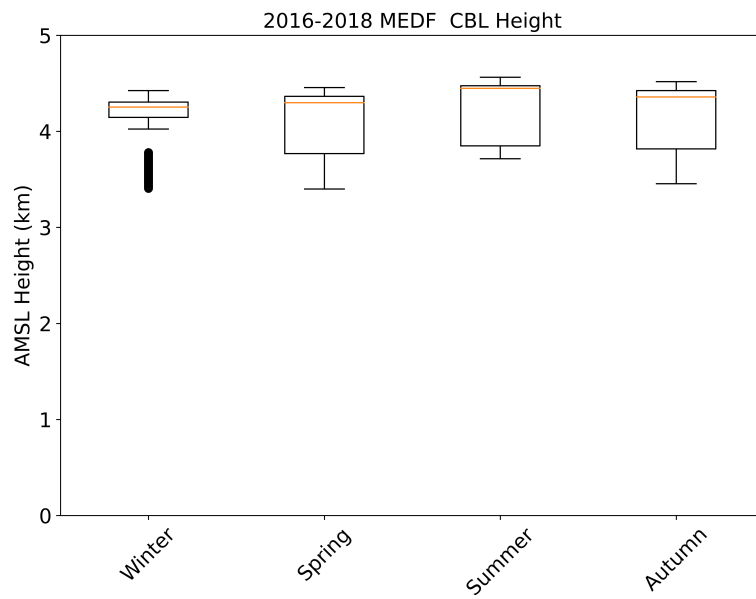

Figure 20: The maximum height reached for the MEDF site given the CBL height restriction.

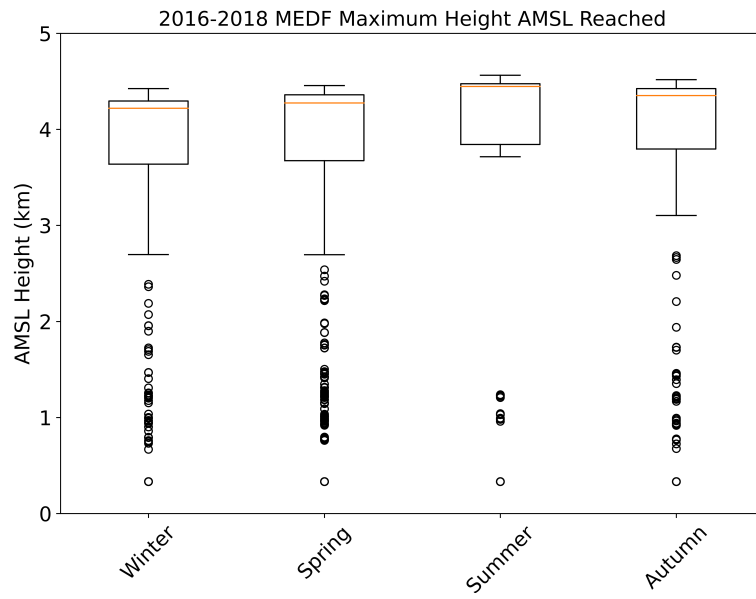

Figure 21: The maximum height reached for the MEDF site.

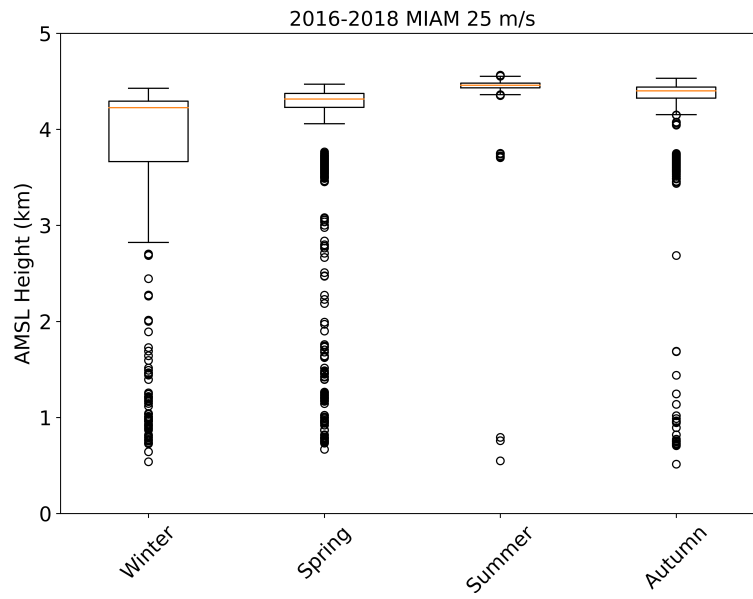

Figure 22: The maximum height reached for the MIAM site given a maximum wind speed tolerance of  $25 \text{ m s}^{-1}$ .

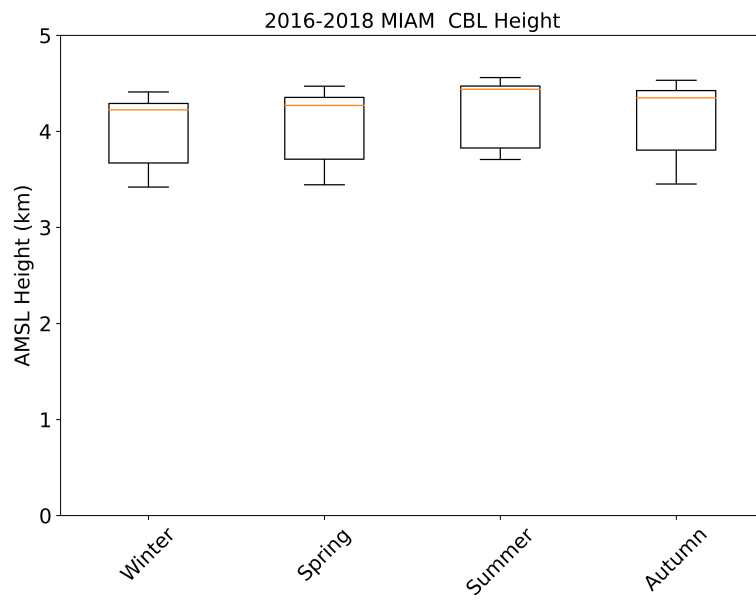

Figure 23: The maximum height reached for the MIAM site given the CBL height restriction.

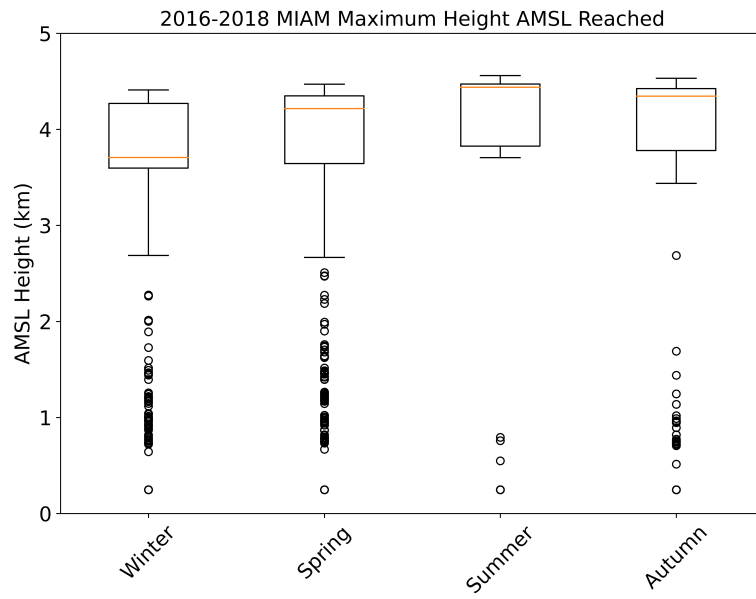

Figure 24: The maximum height reached for the MIAM site.

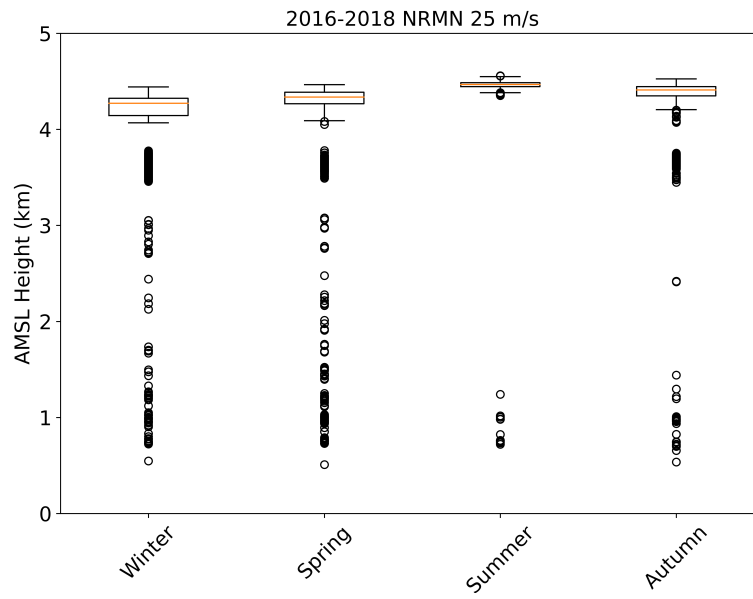

Figure 25: The maximum height reached for the NRMN site given a maximum wind speed tolerance of  $25 \text{ m s}^{-1}$ .

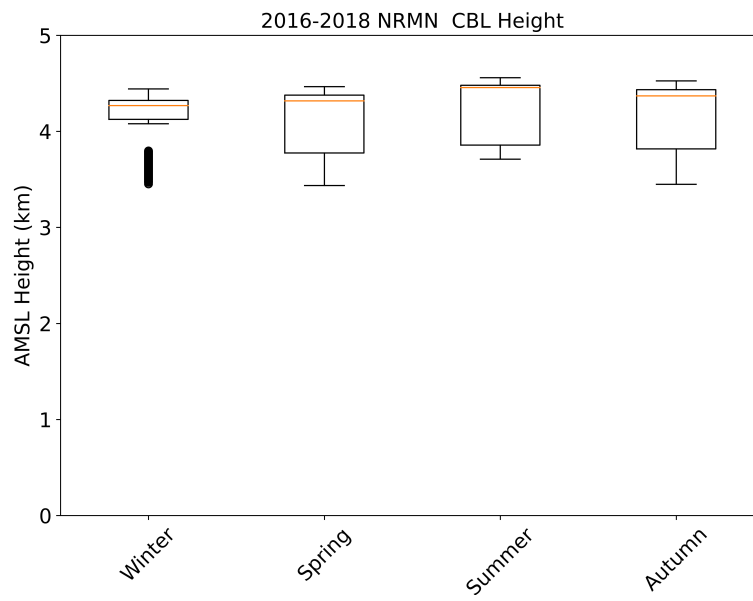

Figure 26: The maximum height reached for the NRMN site given the CBL height restriction.

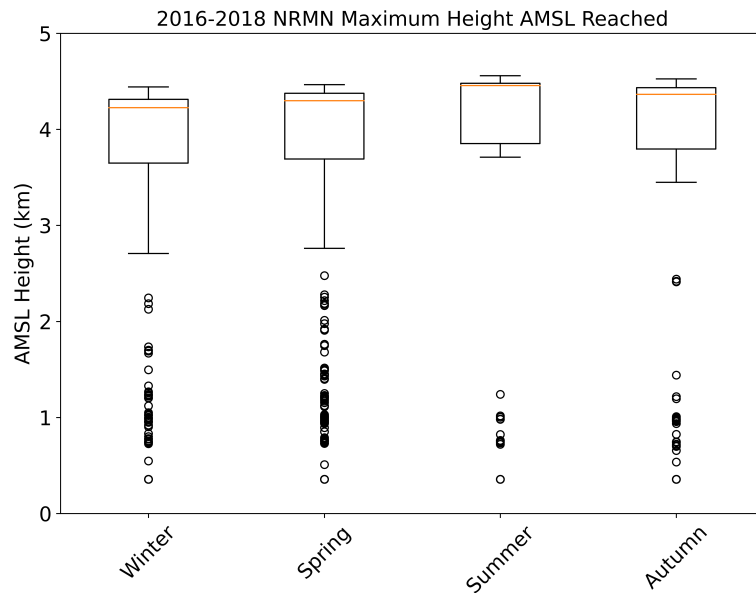

Figure 27: The maximum height reached for the NRMN site.

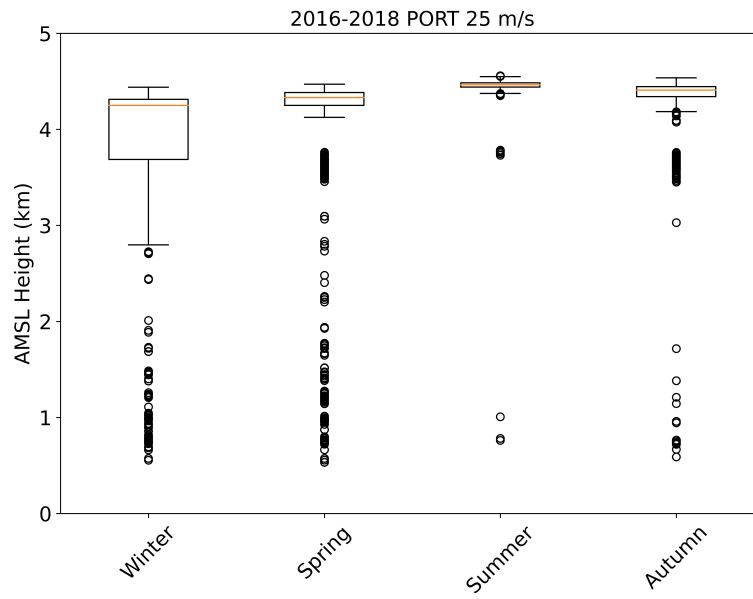

Figure 28: The maximum height reached for the PORT site given a maximum wind speed tolerance of  $25 \text{ m s}^{-1}$ .

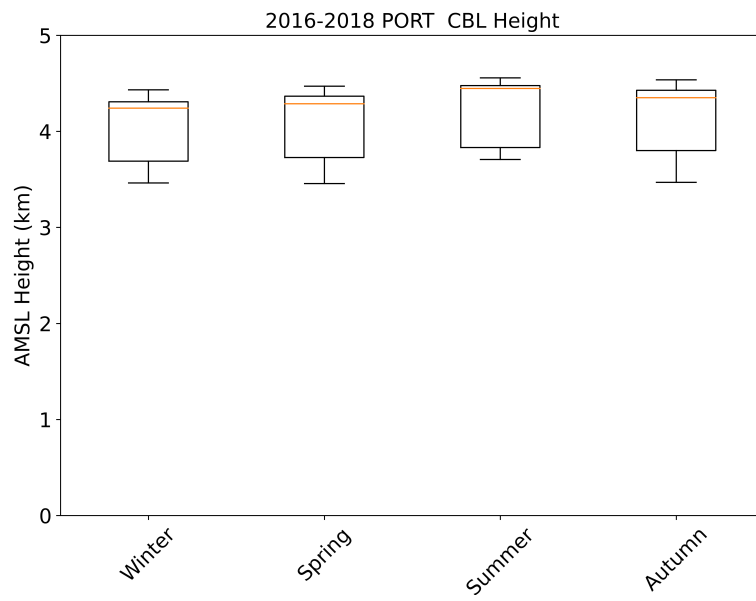

Figure 29: The maximum height reached for the PORT site given the CBL height restriction.

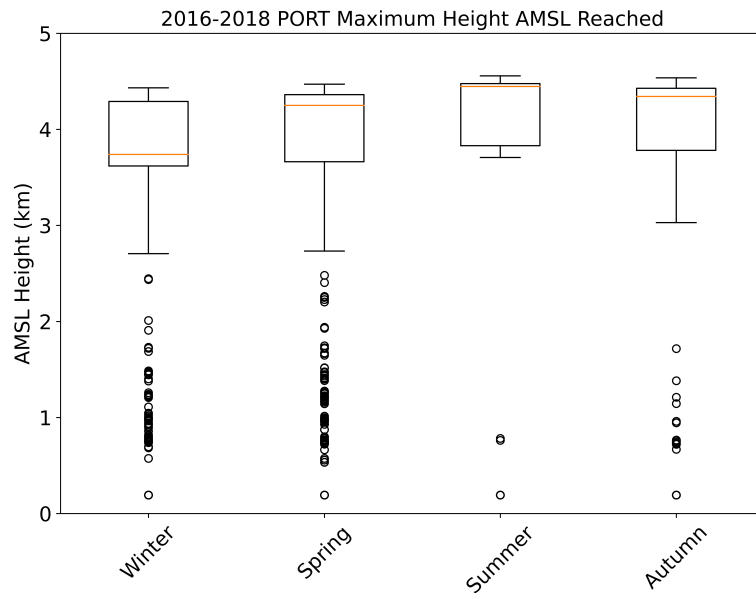

Figure 30: The maximum height reached for the PORT site.

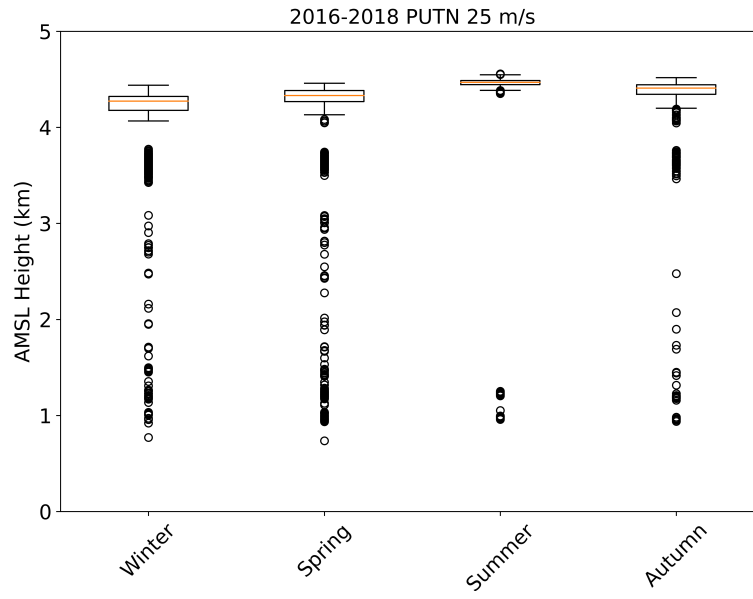

Figure 31: The maximum height reached for the PUTN site given a maximum wind speed tolerance of  $25 \text{ m s}^{-1}$ .

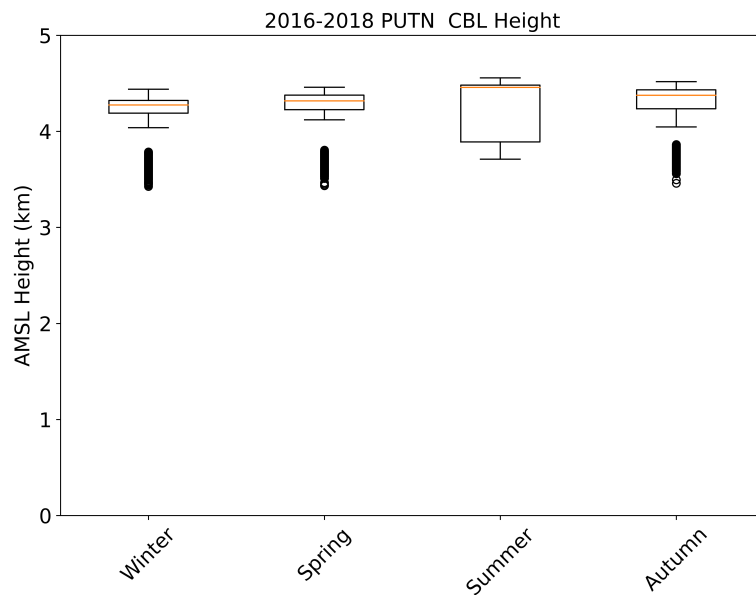

Figure 32: The maximum height reached for the PUTN site given the CBL height restriction.

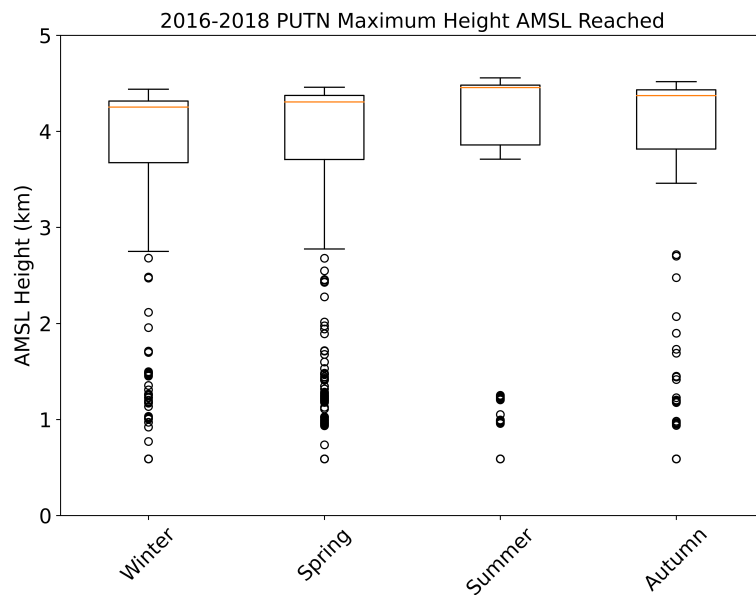

Figure 33: The maximum height reached for the PUTN site.
